# Supplementary material for: Aryl hydrocarbon receptor blocks aging-induced senescence in the liver and fibroblast cells
Source: publisher site journal article supplement (doi:10.18632/aging.204103), 2022-05-26
Supplement: Supplementary file [file aging-v14i10-204103-supplementary-material-SD1.pdf]

SUPPLEMENTARY FIGURE

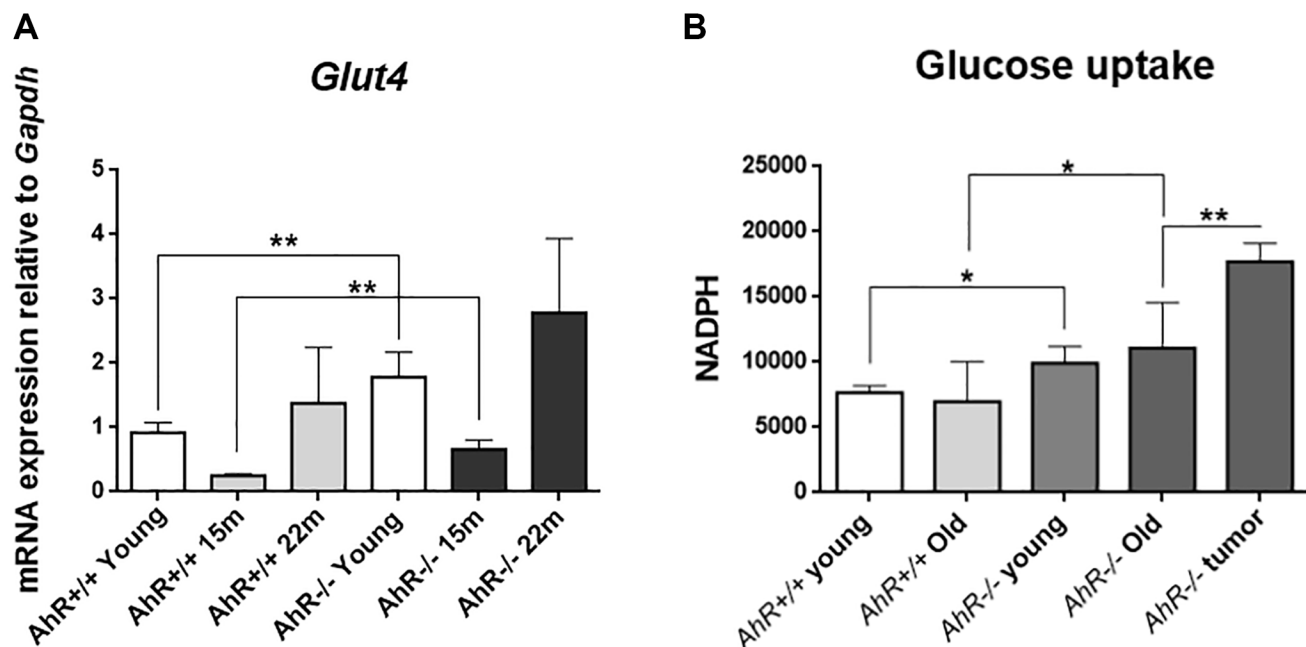

**Supplementary Figure 1.** (A) mRNA level of the glucose transporter *Glut4* was determined by RT-qPCR in *AhR*<sup>+/+</sup> and *AhR*<sup>-/-</sup> livers at the indicated ages using the oligonucleotides indicated in Supplementary Table 1. *Gapdh* was used to normalize target gene expression ( $\Delta\text{Ct}$ ) and  $2^{-\Delta\Delta\text{Ct}}$  to calculate changes in mRNA levels with respect to wild type or untreated conditions. (B) Glucose uptake was measured in young and aged *AhR*<sup>+/+</sup> and *AhR*<sup>-/-</sup> livers by the Picoprobe Hexokinase activity assay kit (Biovision). Data are shown as mean + SD. (\* $P < 0.05$ ; \*\* $P < 0.01$ ).
