# Supplementary material for: Aryl hydrocarbon receptor blocks aging-induced senescence in the liver and fibroblast cells
Source: publisher site journal article supplement (doi:10.18632/aging.204103), 2022-05-26
Supplement: Supplementary file [file aging-v14i10-204103-supplementary-material-SD2.pdf]

## SUPPLEMENTARY TABLES

**Supplementary Table 1. Oligonucleotide sequences used for mRNA level analyses.**

| Gene name     | Sequence 5'–3'                                                                                               |
|---------------|--------------------------------------------------------------------------------------------------------------|
| <i>AhR</i>    | Fw: AGCCGGTGCAGAAAACAGTAA<br>Rv: AGGCGGTCTAACTCTGTGTGT                                                       |
| <i>Cyp1a1</i> | Fw: ACAGACAGCCTCATTGAGCA<br>Rv: GGCTCCACGAGATAGCAGTT                                                         |
| <i>Tnfa</i>   | Fw: CCACCACGCTCTTCTGTCTA<br>Rv: CTCCACTTGGTGGTTTGCTA                                                         |
| <i>IL1</i>    | Fw: CGGGTGACAGTATCAGCAAC<br>Rv: GACAAACTTCTGCCTGACGA                                                         |
| <i>Glut4</i>  | Fw: ATGACCAAGCCCTGAATCTG<br>Rv: CGTAGGATGTGGTGATGACG                                                         |
| <i>p16</i>    | Fw: TACCCCGATTCAGGTGAT<br>Rv: TTGAGCAGAAGAGCTGCTACGT<br>Fw: GTCGCAGGTTCTTGGTCACT<br>Rv: CGAATCTGCACCGTAGTTGA |
| <i>p21</i>    | Fw: GCCTTAGCCCTCACTCTGTG<br>Rv: AGCTGGCCTTAGAGGTGACA                                                         |
| <i>p53</i>    | Fw: TGGAAGACTCCAGTGGGAA<br>Rv: TCTTCTGTACGGCGGTCTCT                                                          |
| <i>Mmp3</i>   | Fw: AGTCAGGGTCACCCACAAAG<br>Rv: GCATTGGGTATCCATCCATC                                                         |
| <i>Gapdh</i>  | Fw: TGAAGCAGGCATCTCAGGG<br>Rv: CGAAGGTGCAAGAGTGGGA                                                           |

**Supplementary Table 2. Oligonucleotide sequences used for chromatin immunoprecipitation (ChIP).**

| Gene name    | Sequence 5'–3'                                        |
|--------------|-------------------------------------------------------|
| <i>p16</i>   | Fw: GGCACTCCCAGCAAGTAGAT<br>Rv: CACAAACGTGCCTCCTATACA |
| <i>p21</i>   | Fw: TTTGTTGTCCTCGCCCTCAT<br>Rv: ACGCACGTACACAGACACA   |
| <i>Tnfa</i>  | Fw: CCAGACACTCACCTCATCCC<br>Rv: TGGAAGTGGCAGAAGAGGC   |
| <i>Gapdh</i> | Fw: TGAAGCAGGCATCTCAGGG<br>Rv: CGAAGGTGCAAGAGTGGGA    |
